# Supplementary material for: Searching Anti-Zika Virus Activity in 1H-1,2,3-Triazole Based Compounds
Source: MDPI journal article supplement (doi:10.3390/molecules26195869), 2021-09-28
Supplement: s1 [file s1]

# Supplementary Materials: Searching Anti-Zika Virus Activity in 1*H*-1,2,3-triazole based compounds

Willyenne M. Dantas <sup>1,2</sup>, Valentina N. M. de Oliveira <sup>3,4</sup>, Diogo A. L. Santos <sup>4</sup>, Gustavo Seabra <sup>4</sup>, Prem Prakash Sharma<sup>5</sup>, Brijesh Rathi <sup>5</sup>, Lindomar J. Pena <sup>2,\*</sup> and Ronaldo N. de Oliveira <sup>1,\*</sup>

<sup>1</sup> Department of Chemistry, Federal Rural University of Pernambuco, Recife 52171-900, Brazil; [wil-lyenne.dantas@ufrpe.br](mailto:wil-lyenne.dantas@ufrpe.br) (W.M.D.); [ronaldo.noliveira@ufrpe.br](mailto:ronaldo.noliveira@ufrpe.br) (R.N.O.)

<sup>2</sup> Department of Virology, Aggeu Magalhães Institute (IAM), Oswaldo Cruz Foundation (Fiocruz), Recife 50670-420, Brazil; [lindomar.pena@cpqam.fiocruz.br](mailto:lindomar.pena@cpqam.fiocruz.br) (L.J.P.)

<sup>3</sup> Instituto Federal de Educação Ciência e Tecnologia de Pernambuco, Campus Ipojuca, 55590-000, Brazil; [valentinamelo@ipojuca.ifpe.edu.br](mailto:valentinamelo@ipojuca.ifpe.edu.br) (V.N.M.O.);

<sup>4</sup> Department of Fundamental Chemistry, Federal University of Pernambuco, Recife 50740-540, Brazil; [diogoalveslopessantos@gmail.com](mailto:diogoalveslopessantos@gmail.com) (D.A.L.S.); [gustavo.seabra@gmail.com](mailto:gustavo.seabra@gmail.com) (G.S.)

<sup>5</sup> Laboratory for Translational Chemistry and Drug Discovery, Department of Chemistry, Hansraj College University Enclave, University of Delhi, Delhi 110021, India; [premprakash.cr@gmail.com](mailto:premprakash.cr@gmail.com) (P.P.S.); [brijeshrathi@hrcc.du.ac.in](mailto:brijeshrathi@hrcc.du.ac.in) (B.R.)

\* Correspondence: [ronaldo.noliveira@ufrpe.br](mailto:ronaldo.noliveira@ufrpe.br) (R.N.O.), [lindomar.pena@cpqam.fiocruz.br](mailto:lindomar.pena@cpqam.fiocruz.br) (L.J.P.);

Tel.: +55(81) 3320-6317 (R.N.O.), +55(81) 2123-7849 (L.J.P.)

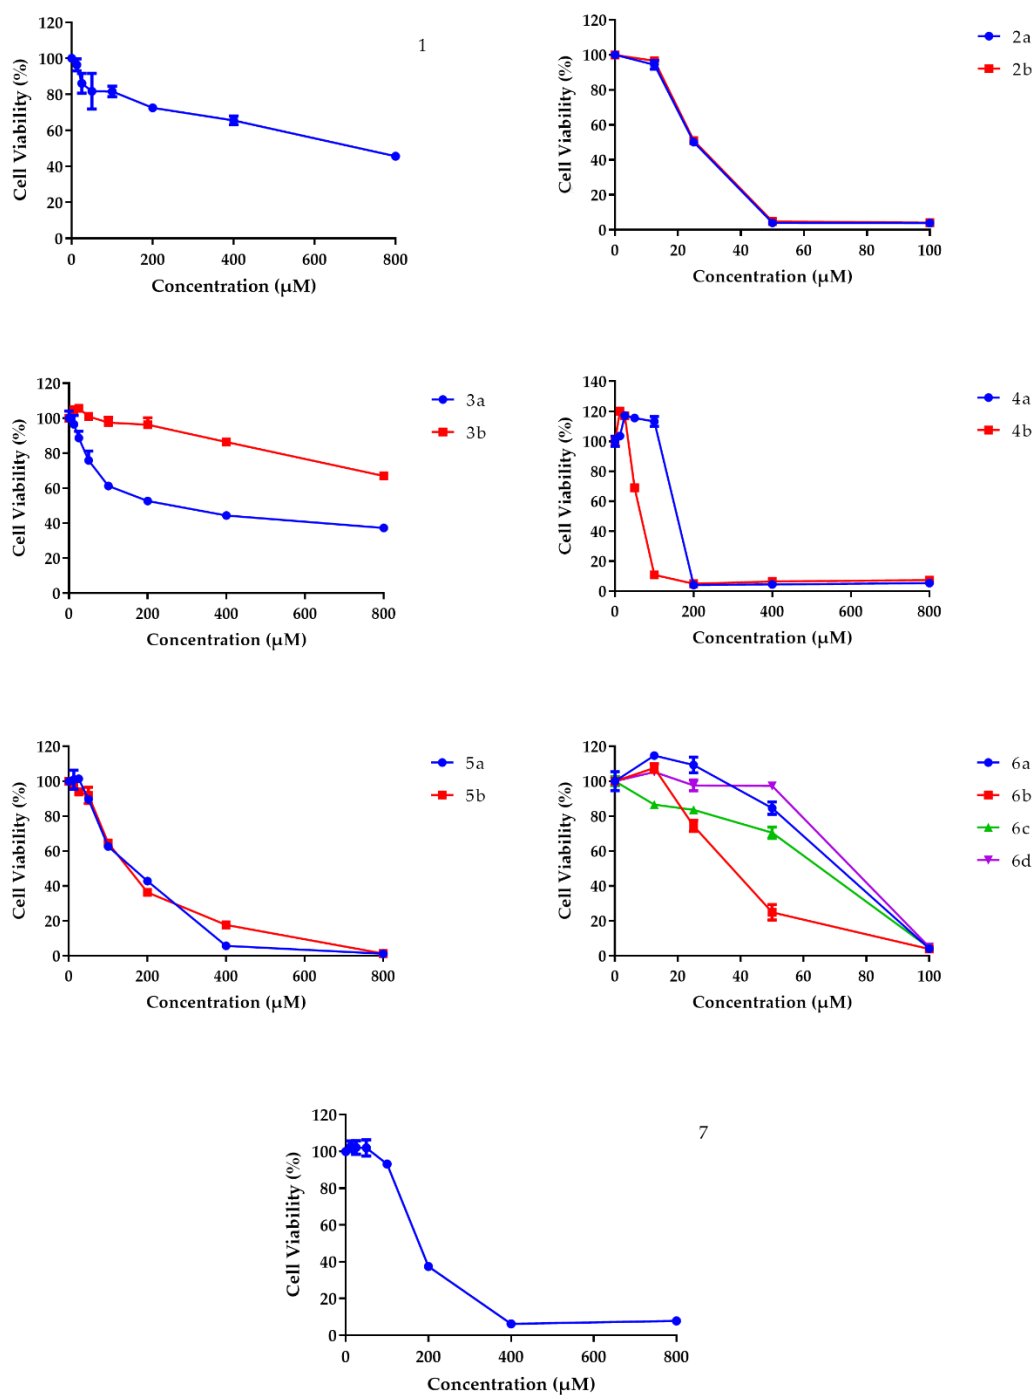

**Figure S1.** Graphical results for cytotoxicity assay of triazole derivatives in Vero cells. Cell viability was determined by the MTT method and statistical analysis was performed in GraphPad Prism program. In brief,  $1 \times 10^4$  Vero cells were plated in 96-well microplates for 24h. The compounds were distributed in concentrations between 800-12,5  $\mu\text{M}$  and incubated for 5 days. After reading the ODs by MTT method on spectrophotometer at 570nm, the graphical formation and determination of CC20 and CC50 was made on GraphPad Prism

**Table S1:** Missing residues in RdRp (5U04) protein.

| Sequence                       | Range   |
|--------------------------------|---------|
| YHGSYEAPTQGSASS                | 306-320 |
| GIAMTDTTPYGQQRVFKEKVDTR        | 341-363 |
| ALGAIFEE                       | 409-416 |
| MMGKREKKQGEFGKAK               | 455-470 |
| DDTAGWDT                       | 534-541 |
| KVVKVLRLPAEGGKTVMDIISRQDQRGSGQ | 577-605 |
| RKDTQ                          | 690-694 |

**Table S2:** Model generated after filling loops for RdRp protein (5U04).

| Entry | Code           | ERRAT          | PROSA        | VERIFY<br>-3D | PROCHECK               |                      |                     |                     |
|-------|----------------|----------------|--------------|---------------|------------------------|----------------------|---------------------|---------------------|
|       |                |                |              |               | Favoured               | Additional Favoured  | Generously Favoured | Disallowed          |
| 1     | Model-1        | 64.2361        | -7.42        | 77.42%        | 87.8%<br>(462)         | 8.9%<br>(47)         | 1.9%<br>(10)        | 1.3%<br>(7)         |
| 2     | Model-2        | 65.2324        | -7.43        | 81.61%        | 89.5%<br>(471)         | 8.7%<br>(46)         | 0.8%<br>(4)         | 1.0%<br>(5)         |
| 3     | Model-3        | 64.9573        | -7.18        | 82.94%        | 88.8%<br>(467)         | 9.1%<br>(48)         | 1.5%<br>(8)         | 0.6%<br>(3)         |
| 4     | Model-4        | 70.7612        | -7.82        | 79.77%        | 90.9%<br>(478)         | 7.0%<br>(37)         | 1.0%<br>(5)         | 1.1%<br>(6)         |
| 5     | Model-5        | 68.4119        | -7.03        | -79.26%       | 88.2%<br>(464)         | 10.1%<br>(53)        | 1.3%<br>(7)         | 0.4%<br>(2)         |
| 6     | Model-6        | 60.7639        | -5.77        | -72.91%       | 87.1%<br>(458)         | 8.7%<br>(46)         | 2.3%<br>(12)        | 1.9%<br>(10)        |
| 7     | Model-7        | 62.9948        | -6.98        | 80.43%        | 88.0%<br>(463)         | 8.9%<br>(47)         | 1.7%<br>(9)         | 1.3%<br>(7)         |
| 8     | Model-8        | 69.4017        | -7.26        | 84.62%        | 88.2%<br>(464)         | 9.7%<br>(51)         | 1.3%<br>(7)         | 0.8%<br>(4)         |
| 9     | <b>Model-9</b> | <b>70.5882</b> | <b>-7.69</b> | <b>84.95%</b> | <b>89.5%<br/>(471)</b> | <b>7.8%<br/>(41)</b> | <b>1.5%<br/>(8)</b> | <b>1.1%<br/>(6)</b> |
| 10    | Model-10       | 60.0349        | -5.51        | 82.94%        | 89.4%<br>(470)         | 8.6%<br>(45)         | 1.3%<br>(7)         | 0.8%<br>(4)         |
| 11    | Model-11       | 63.6522        | -7.62        | 78.93%        | 87.3%<br>(459)         | 9.5%<br>(50)         | 1.5%<br>(8)         | 1.7%<br>(9)         |
| 12    | Model-12       | 63.1488        | -6.46        | 76.09%        | 87.8%<br>(462)         | 9.7%<br>(51)         | 1.3%<br>(7)         | 1.1%<br>(6)         |
| 13    | Model-13       | 64.2123        | -6.39        | 87.12%        | 89.2%<br>(469)         | 8.9%<br>(47)         | 1.5%<br>(8)         | 0.4%<br>(2)         |
| 14    | Model-14       | 69.5502        | -6.28        | 80.60%        | 89.2%<br>(469)         | 8.7%<br>(46)         | 1.0%<br>(5)         | 1.1%<br>(6)         |
| 15    | Model-15       | 68.3566        | -6.01        | 83.44%        | 88.8%<br>(467)         | 8.4%<br>(44)         | 1.9%<br>(10)        | 1.0%<br>(5)         |

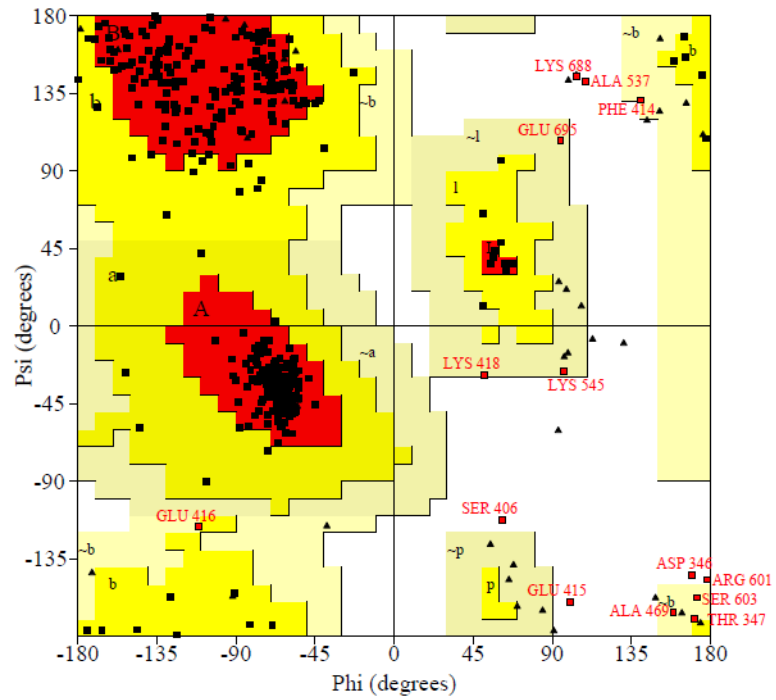

**Figure S2.** Ramachandran map of top scored modeled RdRp (5U04) protein.

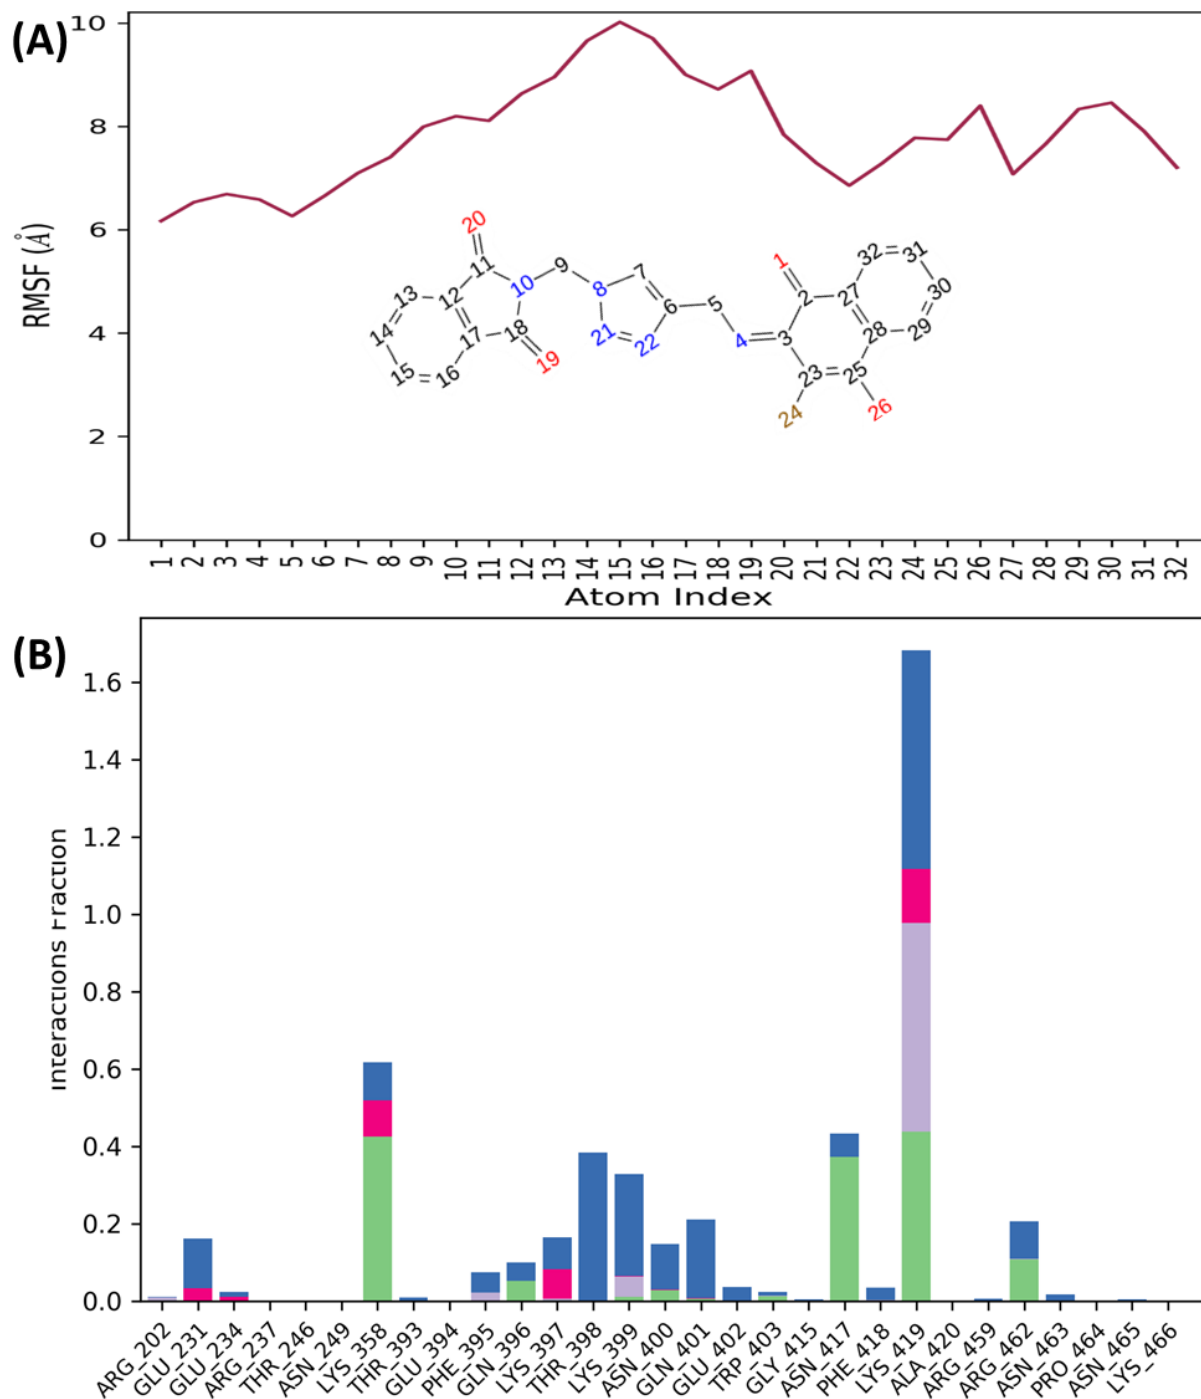

**Figure S3.** MD simulation of **4b**-helicase (6MH3) complex. A) Ligand RMSF-fluctuations of each atom of compound **4b** with respect to protein; B) Histogram plot showed interacting residues with compound **4b** during MD simulation (H-bond: green, hydrophobic: grey, salt bridge interaction: pink, and water bridge interaction: blue).

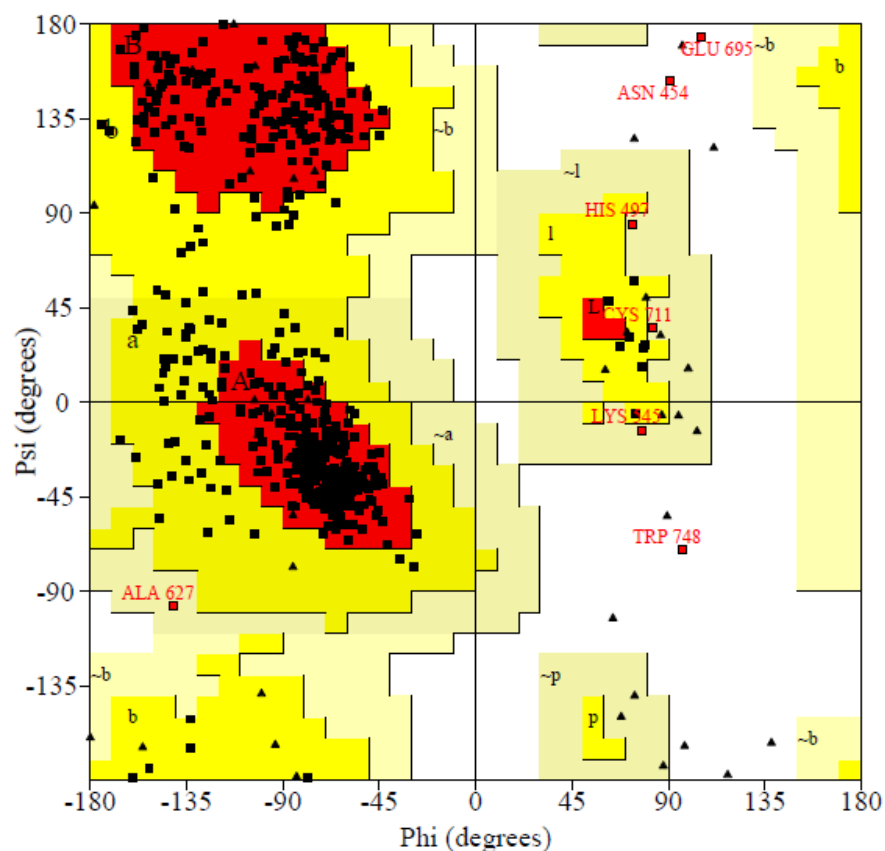

**Figure S4.** Ramachandran map after MD Simulation for **4b**-RdRp (5U04) complex.

**Table S3:** Site score of predicted binding site by Site Map for helicase protein (6MH3).

| Binding Sites | Site Score | Residues                                                                                                                                                                                                                                                                                                                                                                                                                                                    |
|---------------|------------|-------------------------------------------------------------------------------------------------------------------------------------------------------------------------------------------------------------------------------------------------------------------------------------------------------------------------------------------------------------------------------------------------------------------------------------------------------------|
| Site 3        | 1.097      | 196, 197, 198, 199, 200, 201, 202, 228, 231, 286, 288, 316, 317, 415, 417, 455, 459, 462                                                                                                                                                                                                                                                                                                                                                                    |
| Site 1        | 1.055      | 224, 225, 226, 244, 245, 246, 262, 263, 264, 265, 267, 268, 271, 287, 288, 289, 290, 291, 292, 293, 298, 318, 320, 321, 322, 363, 364, 365, 366, 367, 368, 369, 370, 385, 386, 387, 388, 389, 390, 391, 392, 393, 394, 407, 408, 409, 410, 411, 413, 414, 429, 430, 431, 432, 442, 445, 448, 449, 451, 452, 456, 479, 480, 481, 484, 486, 487, 489, 493, 508, 514, 533, 536, 537, 540, 541, 542, 543, 597, 598, 599, 601, 602, 603, 604, 605, 608, 609, 617 |

|        |       |                                                                                                                                                                          |
|--------|-------|--------------------------------------------------------------------------------------------------------------------------------------------------------------------------|
| Site 2 | 0.948 | 269, 270, 271, 272, 273, 274, 275, 276, 277, 278, 279, 300, 304, 309, 495, 496, 497, 498, 499, 500, 501, 502, 503, 504, 523, 524, 525, 526, 529, 530, 533, 534, 537, 538 |
| Site 4 | 0.928 | 227, 230, 231, 358, 392, 395, 396, 398, 399, 401, 403, 417, 418, 419, 420, 421, 460, 461, 462, 463, 466, 469                                                             |
| Site 5 | 0.698 | 233, 236, 237, 238, 239, 240, 241, 243, 250, 251, 252, 253, 256                                                                                                          |

**Table S4:** Site score of predicted binding site by Site Map for RdRp protein ((5U04)).

| Binding Sites | Site Score | Residues                                                                                                                                                                                                                                                                                                                                                                                                                                                                   |
|---------------|------------|----------------------------------------------------------------------------------------------------------------------------------------------------------------------------------------------------------------------------------------------------------------------------------------------------------------------------------------------------------------------------------------------------------------------------------------------------------------------------|
| Site 1        | 1.008      | 338, 339, 340, 341, 342, 343, 344, 345, 346, 416, 417, 418, 420, 486, 490, 513, 533, 534, 535, 536, 539, 540, 541, 542, 543, 544, 545, 547, 548, 551, 570, 573, 574, 575, 576, 604, 605, 607, 608, 609, 611, 612, 620, 623, 663, 664, 665, 666, 667, 676, 691, 702, 709, 710, 711, 712, 713, 714, 731, 732, 734, 735, 738, 739, 742, 743, 744, 745, 746, 747, 748, 749, 752, 753, 756, 760, 763, 768, 792, 793, 794, 795, 796, 797, 798, 799, 800, 801, 803, 805, 806, 848 |
| Site 3        | 1.002      | 358, 359, 360, 361, 362, 363, 365, 368, 633, 636, 637, 681, 684, 685, 689, 692, 693, 695, 696                                                                                                                                                                                                                                                                                                                                                                              |
| Site 2        | 0.980      | 758, 762, 765, 769, 772, 775, 776, 779, 782, 785, 786, 787, 788, 808, 809, 810, 811, 812, 834, 835, 836, 840, 858, 883, 884, 885, 886, 887, 888                                                                                                                                                                                                                                                                                                                            |
| Site 4        | 0.907      | 400, 403, 404, 412, 413, 415, 416, 417, 419, 422, 454, 455, 459, 465, 470, 471, 472, 473, 476, 479, 483, 487, 491, 494, 495, 602, 603, 604, 605, 606, 607                                                                                                                                                                                                                                                                                                                  |
| Site 5        | 0.764      | 354, 355, 356, 358, 626, 627, 629, 631, 632, 633, 675, 678, 679, 680, 681, 696, 698                                                                                                                                                                                                                                                                                                                                                                                        |

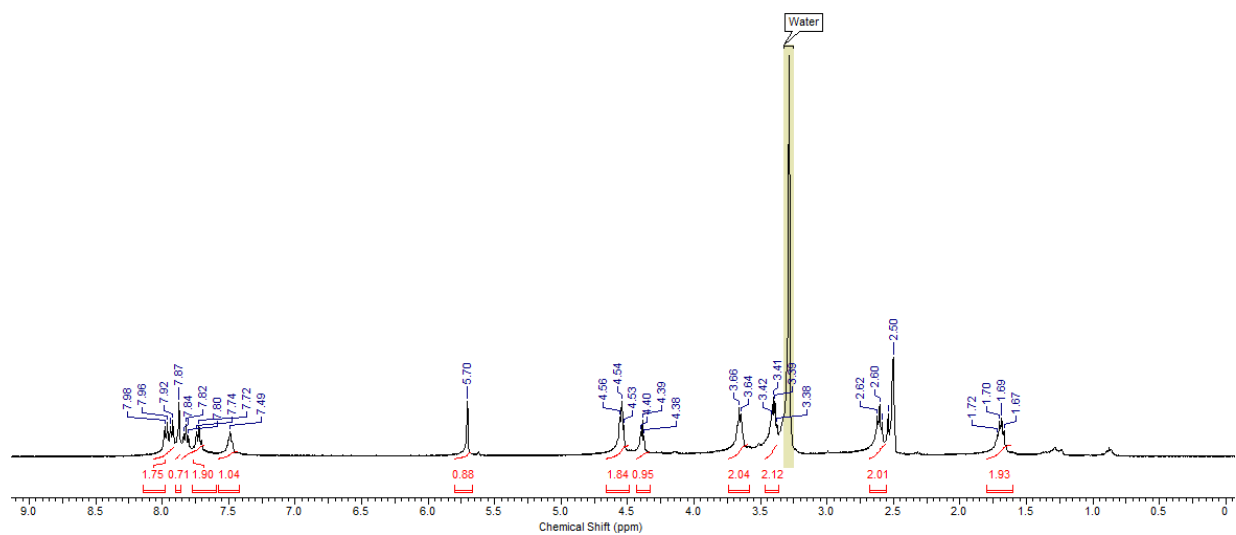

Figure S5.  $^1\text{H}$  NMR of compound **5a**

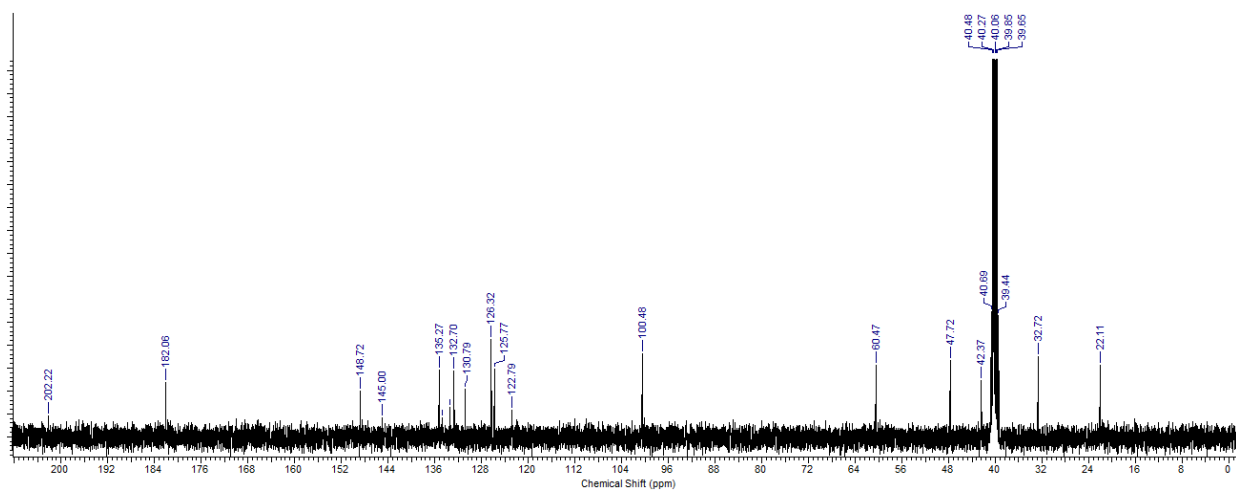

Figure S6.  $^{13}\text{C}$  NMR of compound **5a**
